# Supplementary material
Source: PubMed Central journal article supplement (PMC5608636)

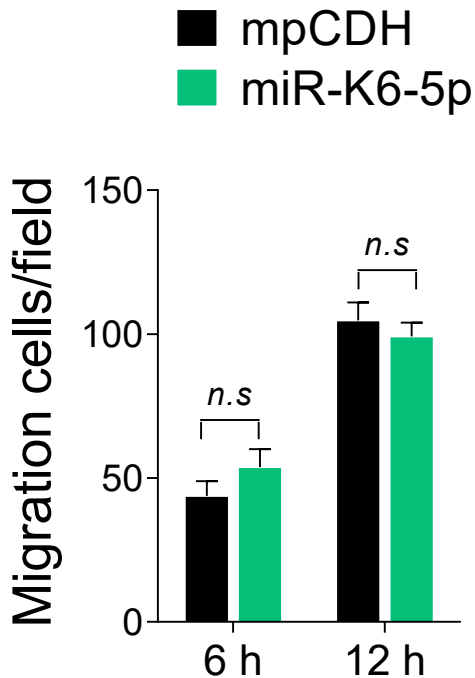

Figure S1

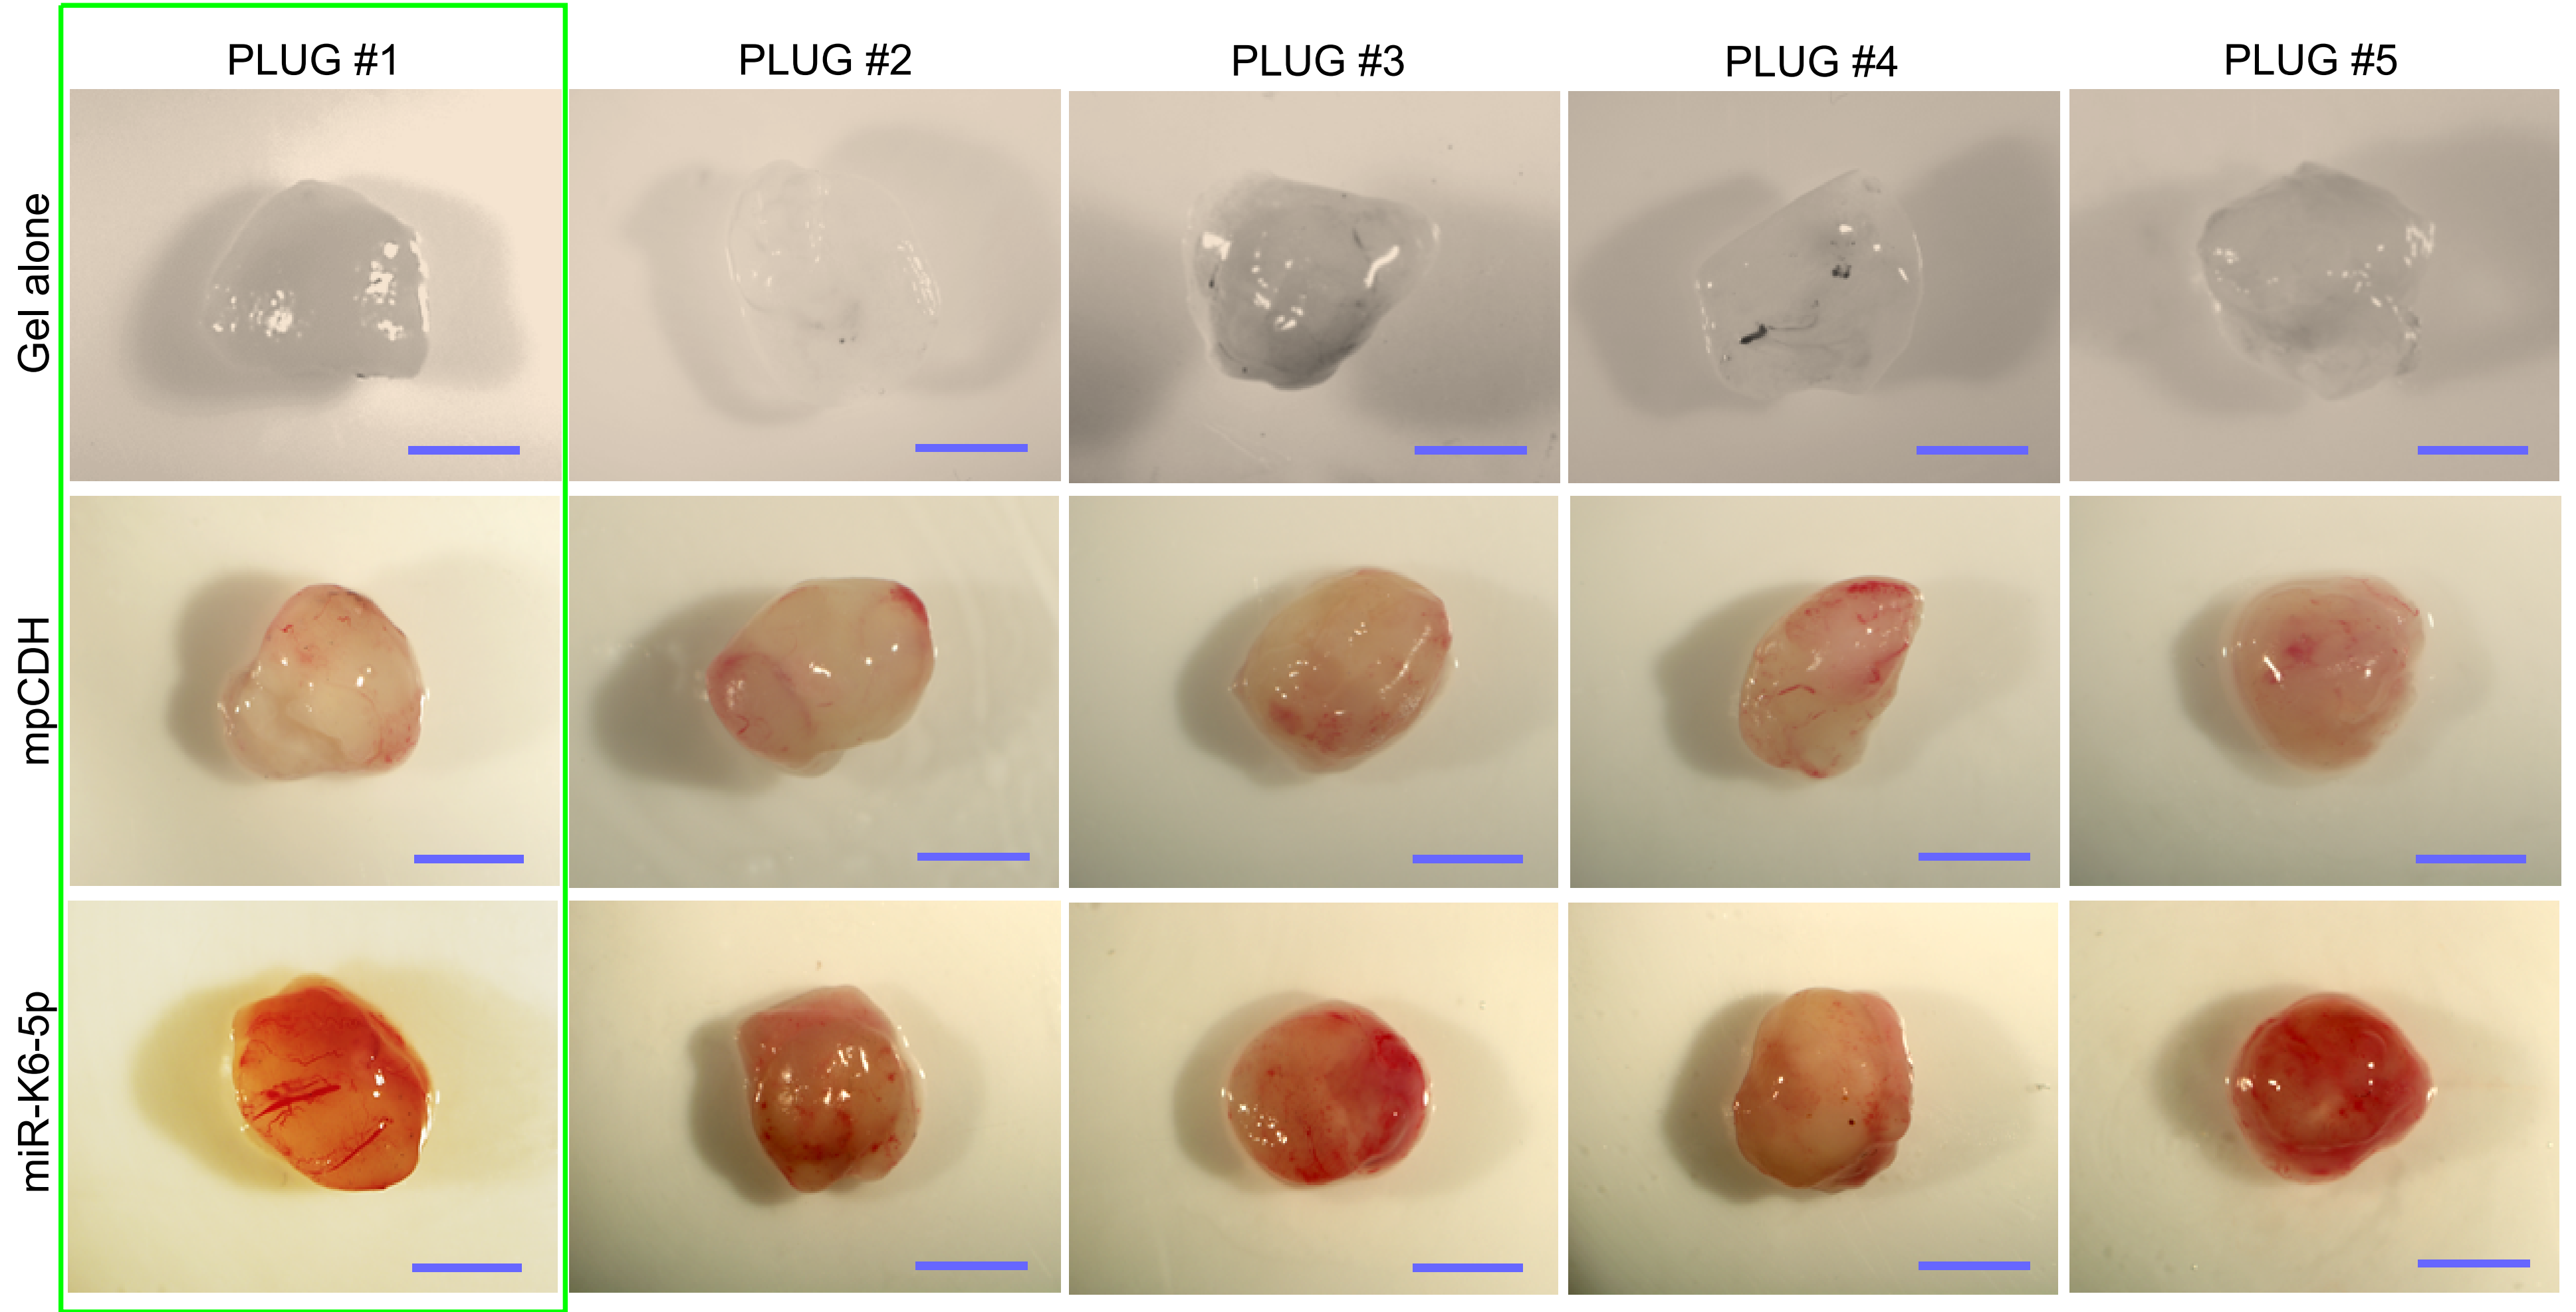

Figure S2

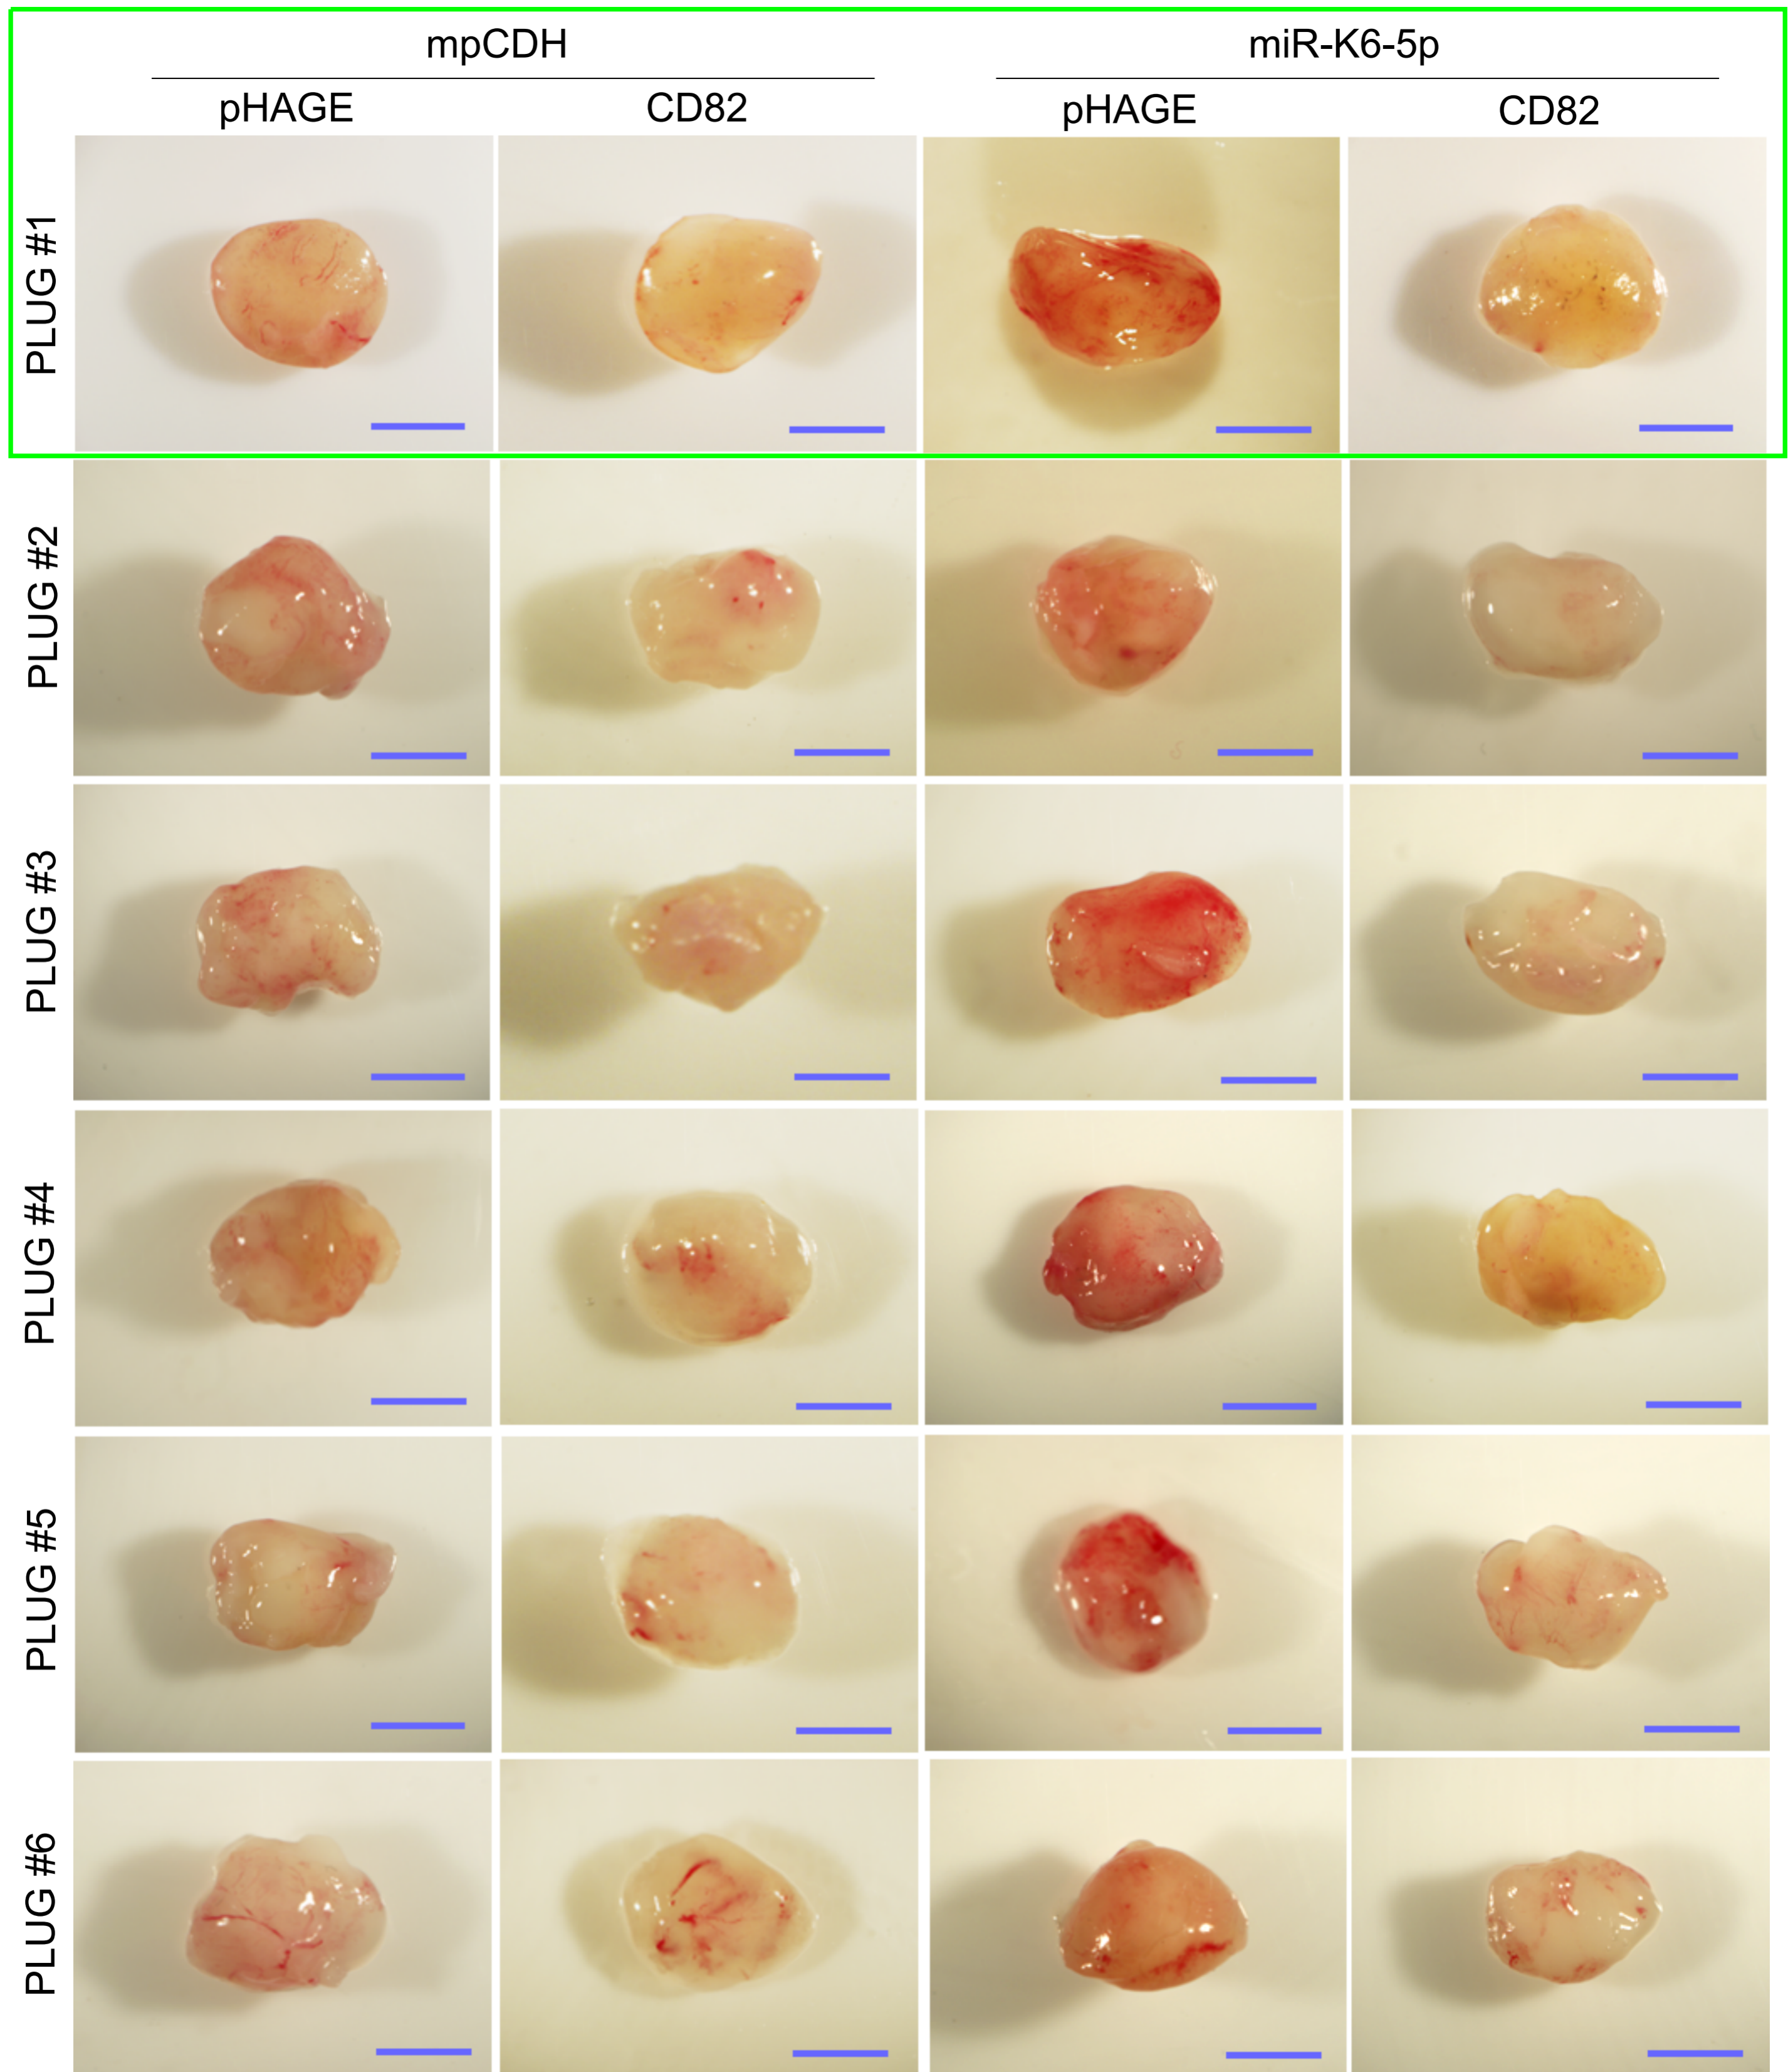

Figure S3

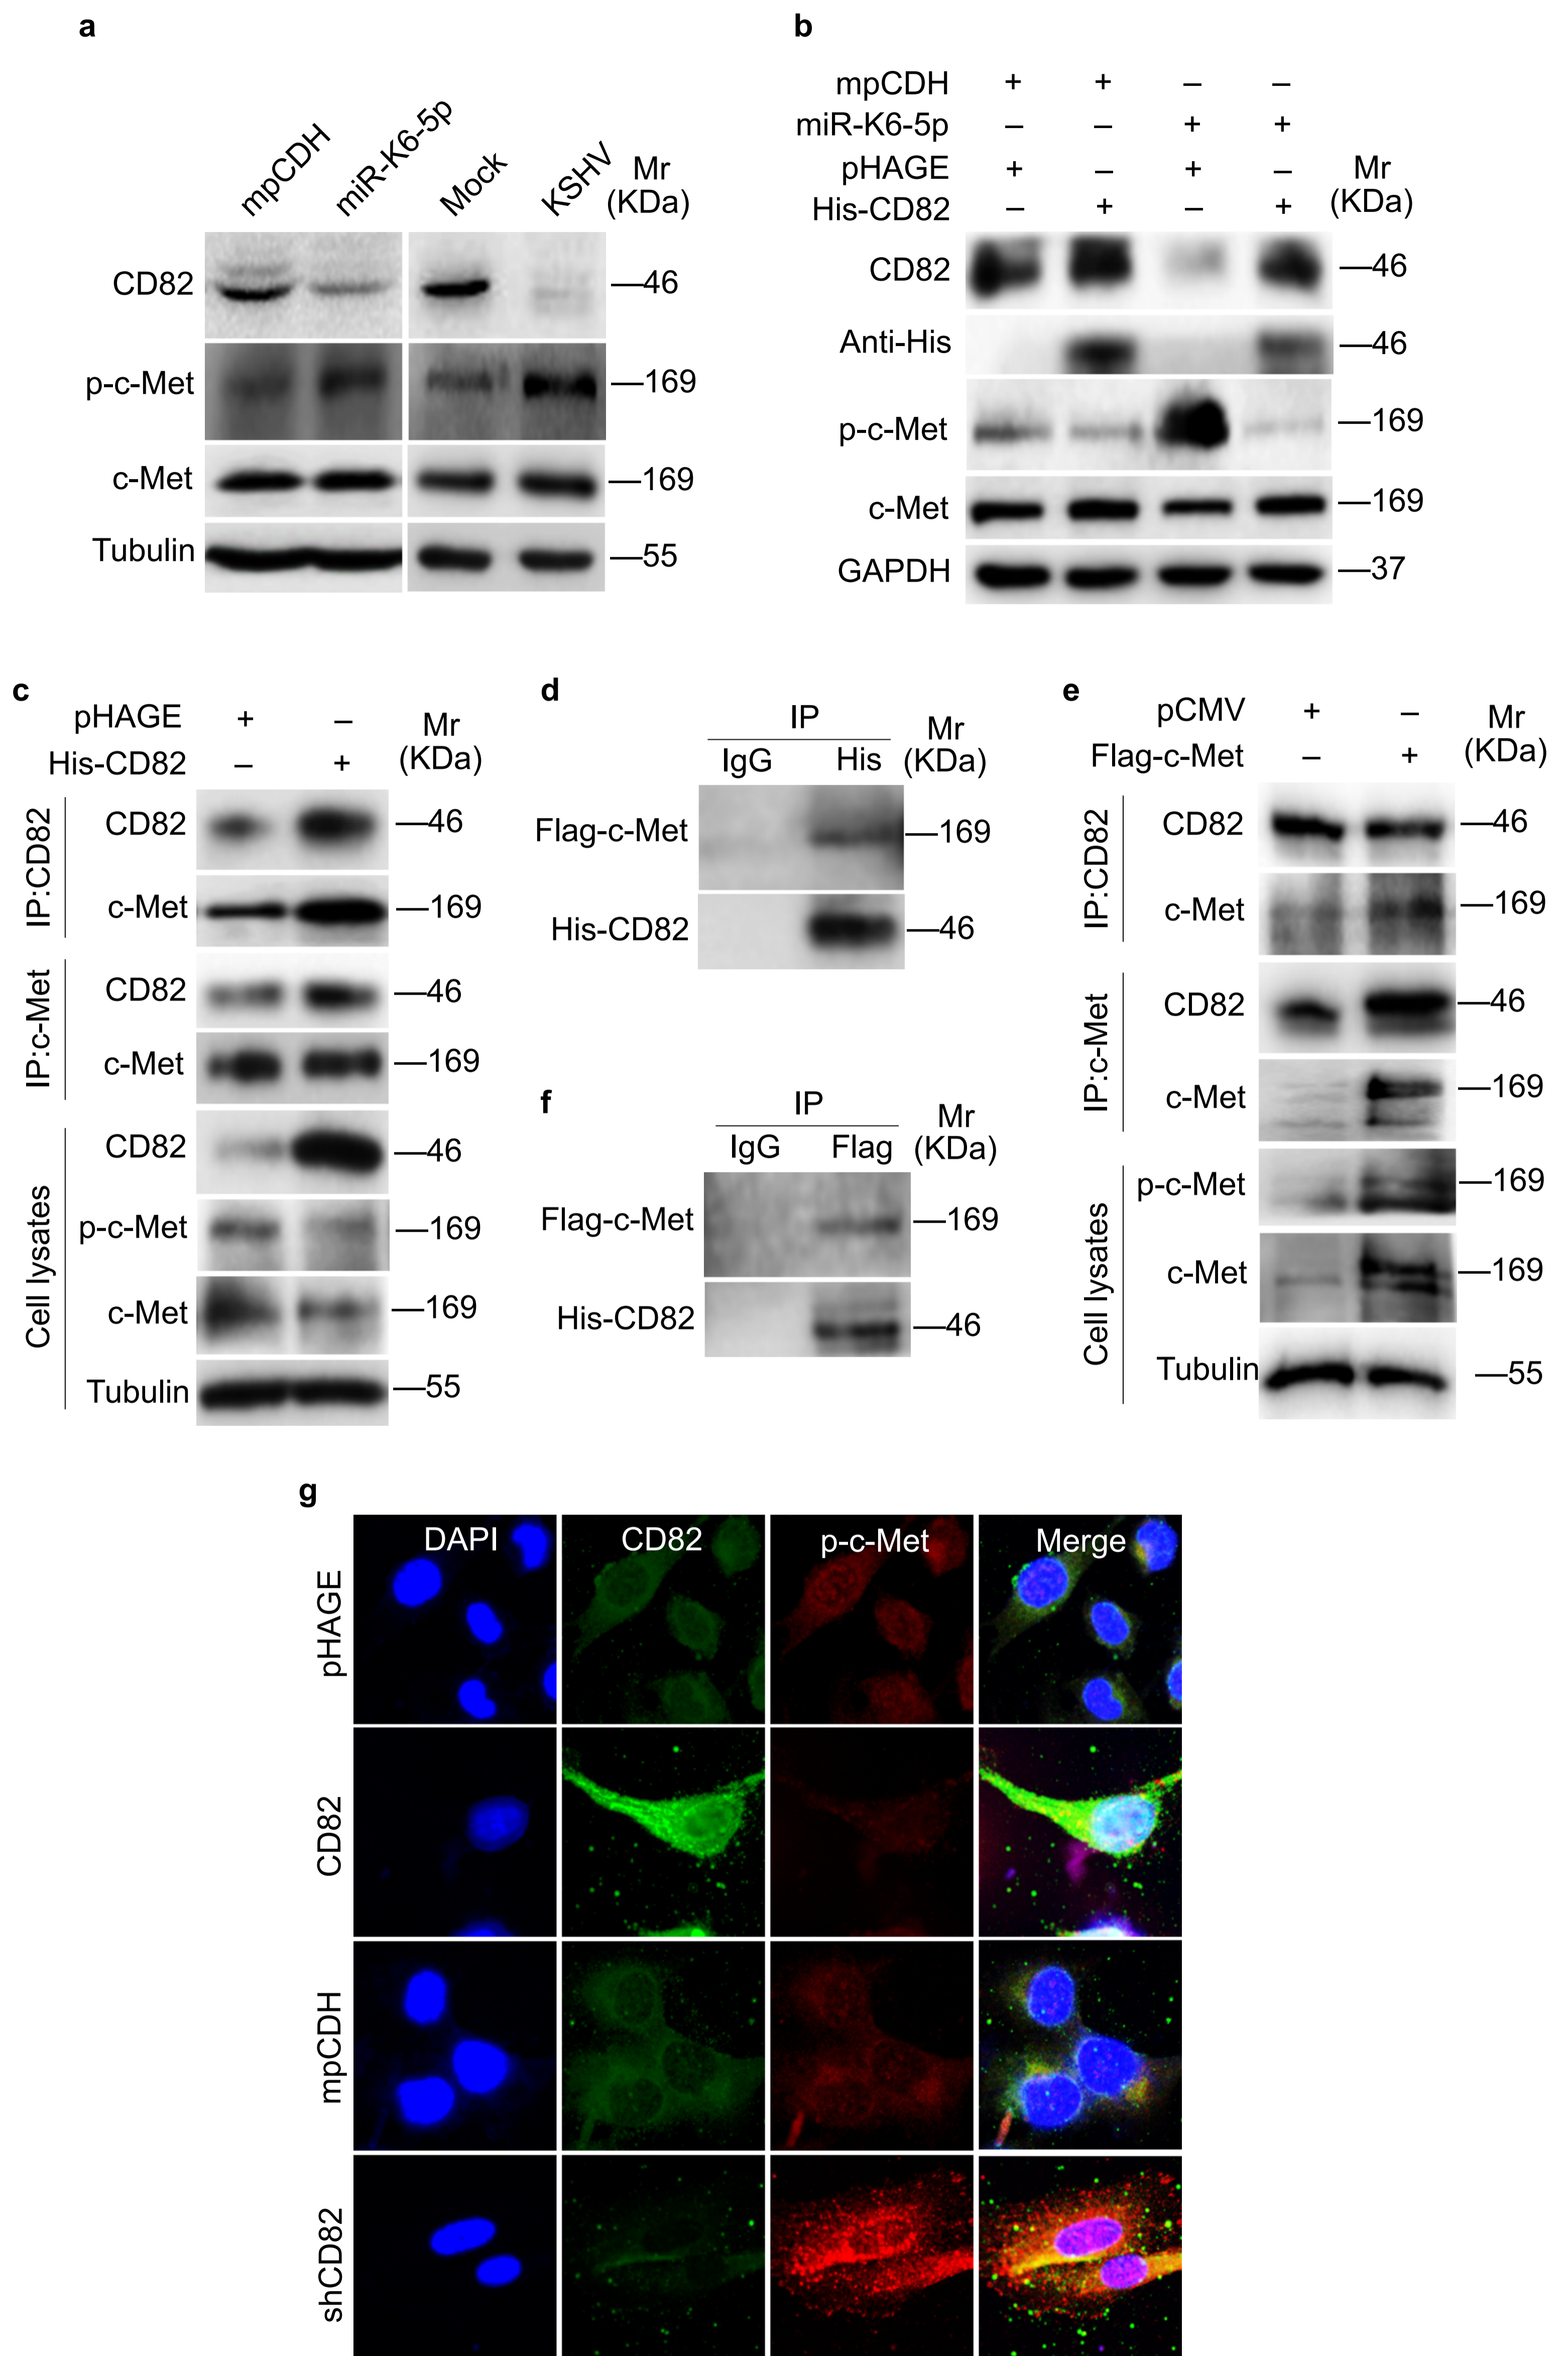

Figure S4

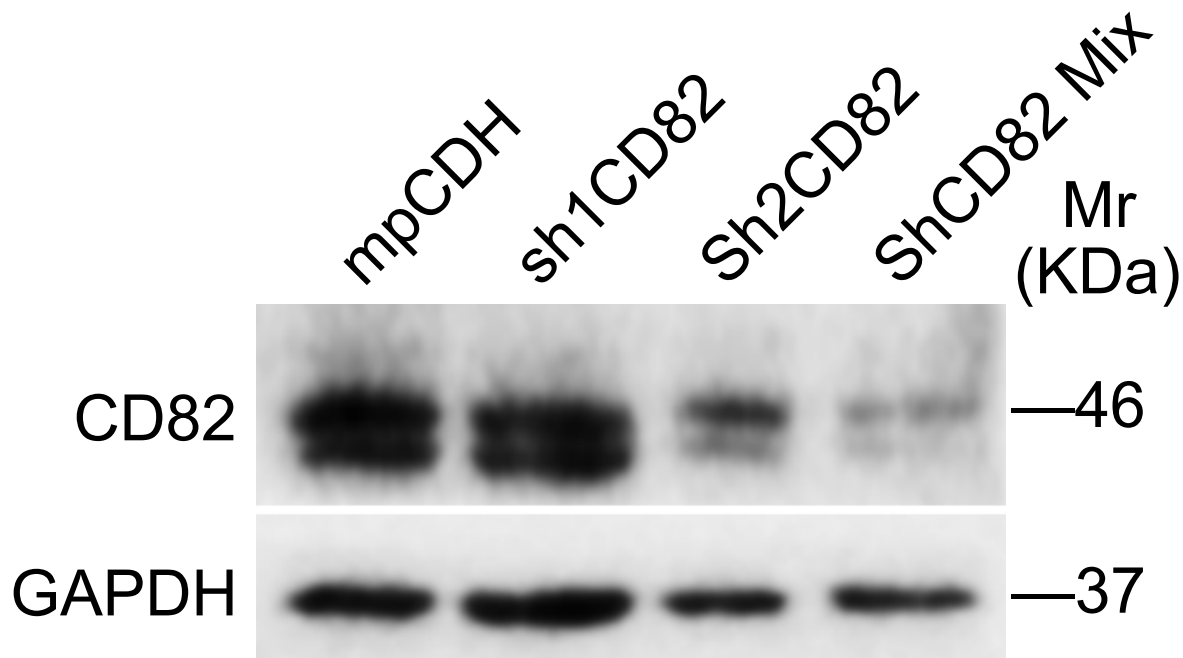

Figure S5

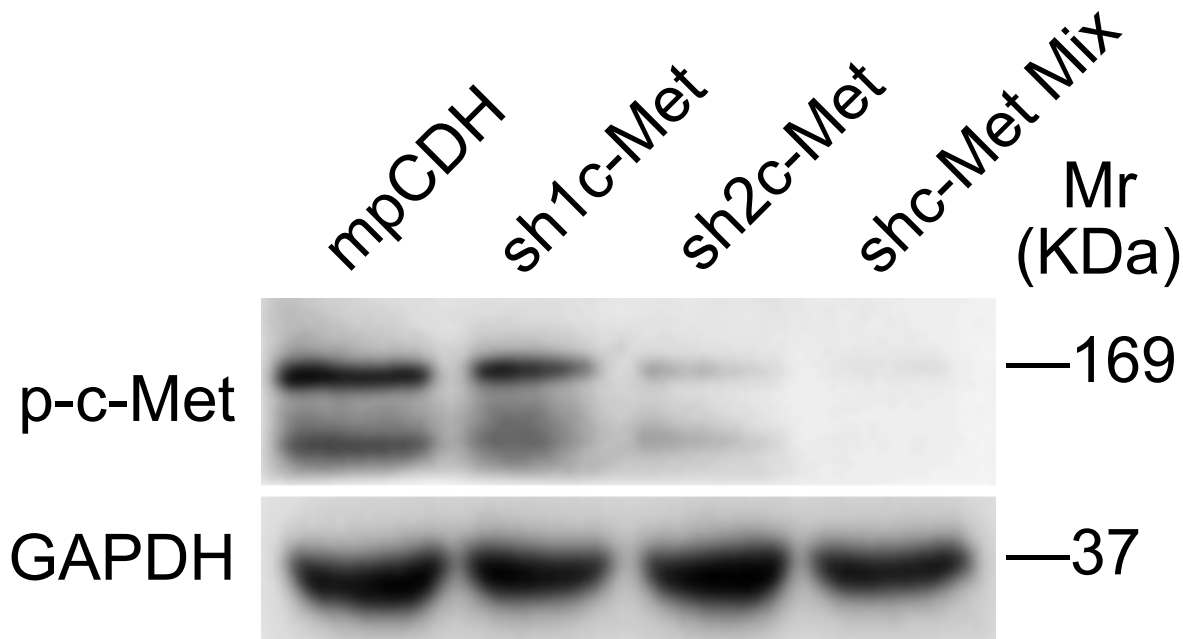

Figure S6

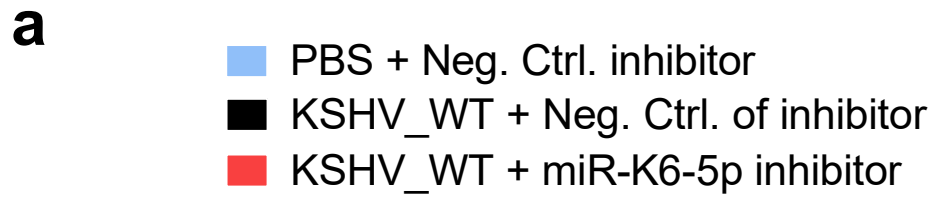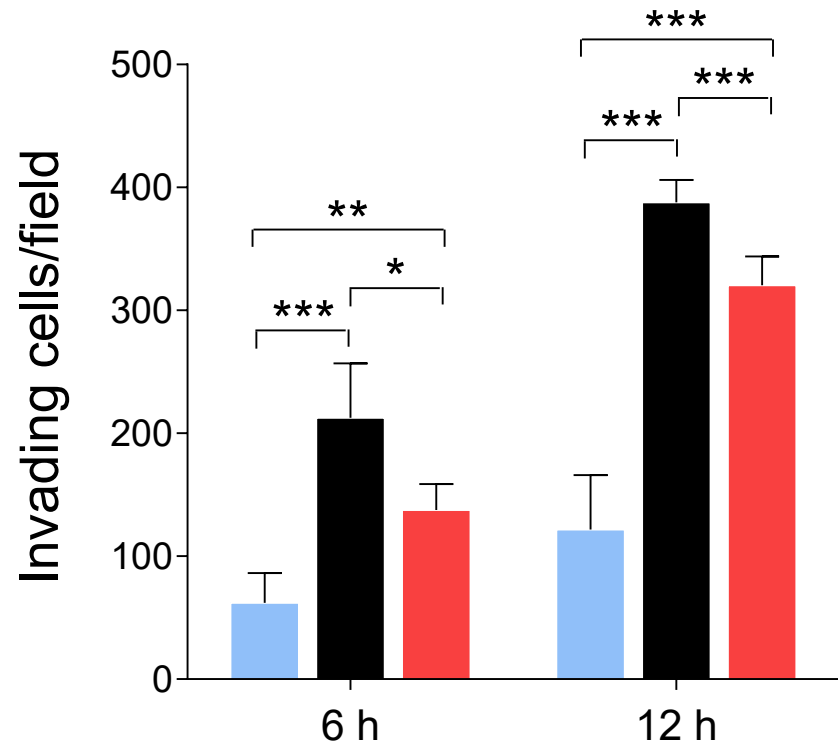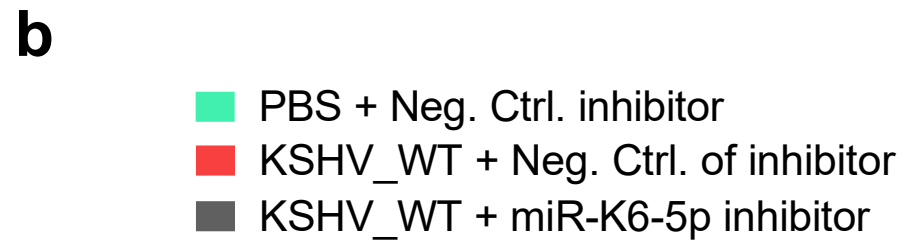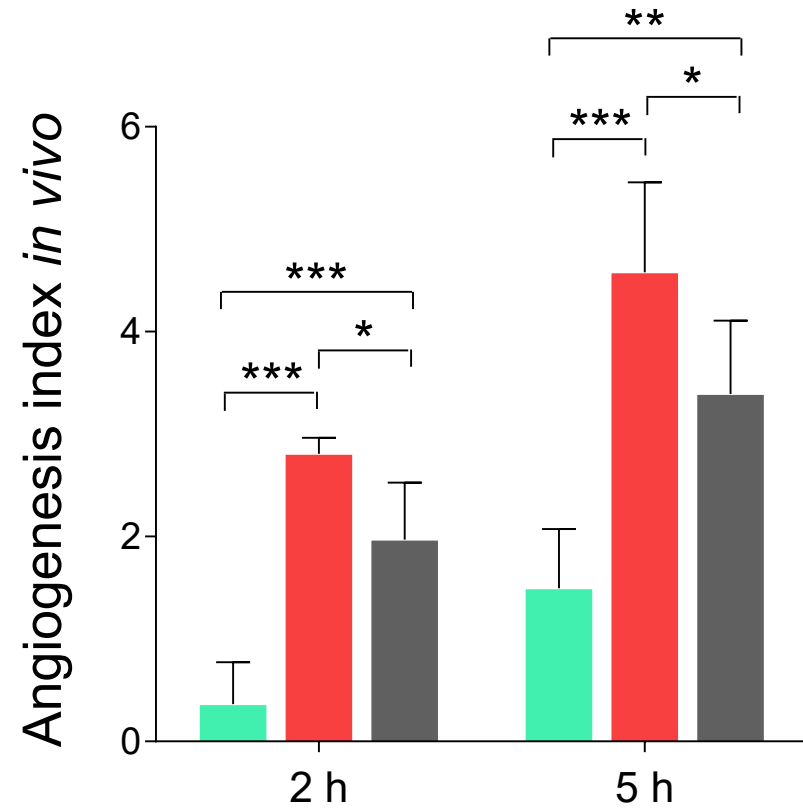

Figure S7

**a**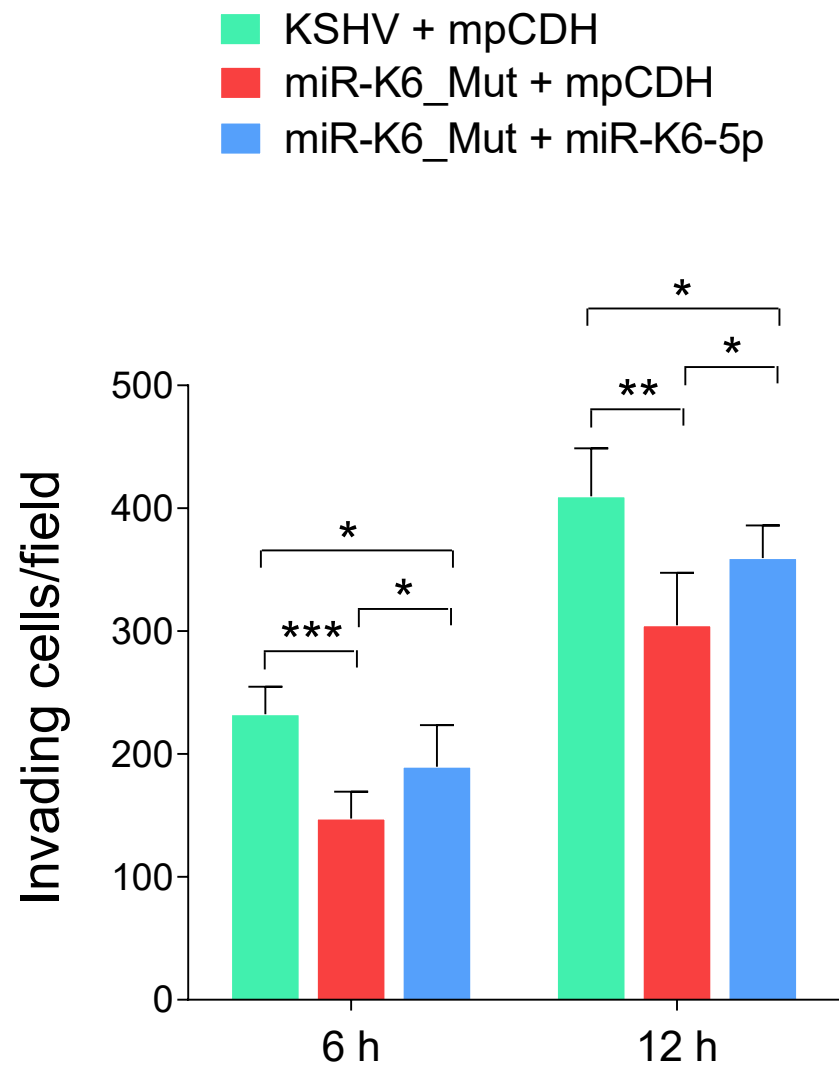**b**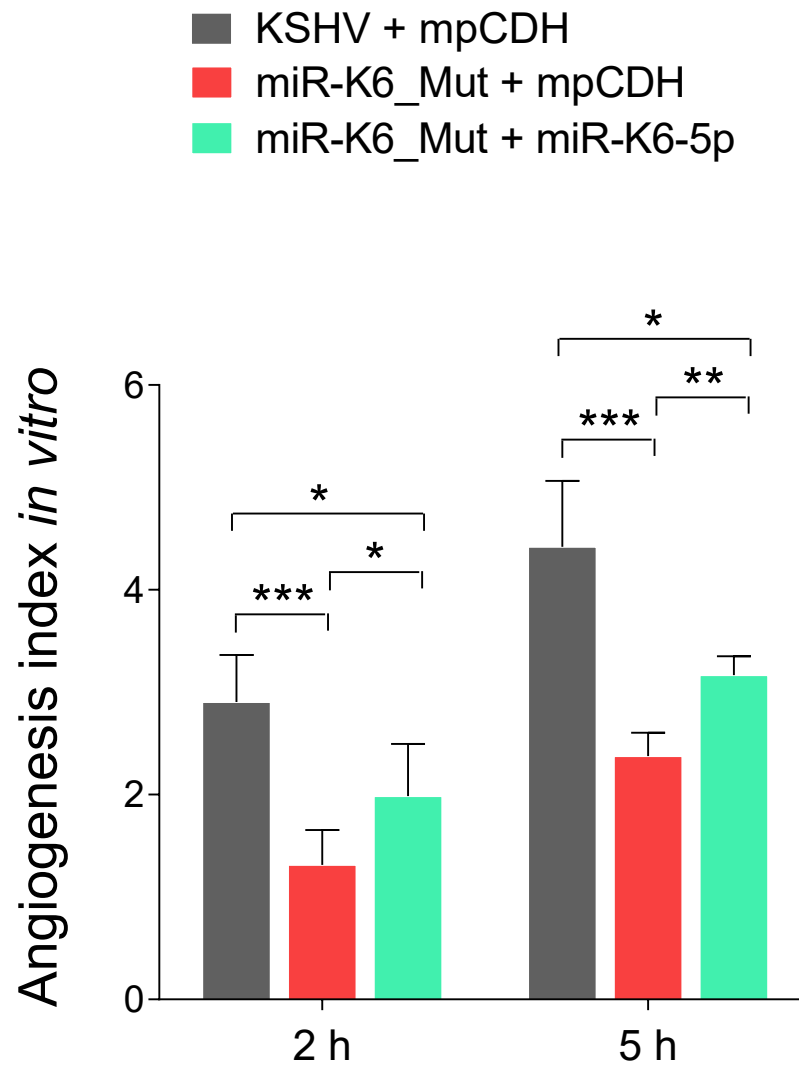

Figure S8

Supplement: NIHMS863507-supplement-1.pdf [file NIHMS863507-supplement-1.pdf]
